# Supplementary material for: The relationship between mood and sleep in different female reproductive states
Source: PubMed Central journal article supplement (PMC4071019; doi:10.1186/1471-244x-14-177), 2014-06-16
Supplement: 1471-244X-14-177-S2.pdf [file 1471-244X-14-177-S2.pdf]

↑ F3 depressive-emotional

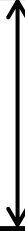

↑ BNSQ insomnia

↓ F1 punishment  
↓ F2 dissatisfaction  
↓ F4 depressive-somatic  
↑ F3 depressive-emotional

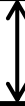

↑ REM awakenings

↑ F2 dissatisfaction  
↑ F4 depressive-somatic  
↓ F3 depressive-emotional

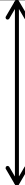

↑ SWS %

↓ F1 punishment  
↓ F2 dissatisfaction  
↓ F4 depressive-somatic  
↑ F3 depressive-emotional

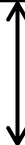

↑ SWS awakenings
