# Supplementary material for: The relationship between mood and sleep in different female reproductive states
Source: PubMed Central journal article supplement (PMC4071019; doi:10.1186/1471-244x-14-177), 2014-06-16

↑ F3 depressive-emotional  
↑ F4 depressive-somatic

↑ F4 depressive-somatic

↑ BNSQ insomnia

↑ Sleep latency

↑ F2 dissatisfaction

↑ REM latency

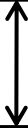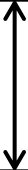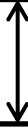

Supplement: 1471-244X-14-177-S3.pdf [file 1471-244X-14-177-S3.pdf]
